# Supplementary material for: Advanced Maternal Age and Fetal Sex Modulate Placentokines and Metabolic Glucose Biomarkers
Source: Research Square preprint supplement (doi:10.21203/rs.3.rs-8145672/v1), 2025-12-22
Supplement: Supplementary file 1 [file 1f30e7cd0122c37acc67a35b.docx]

Supplementary material

| Analyte | Maternal Age | Fetal Sex | Interaction | Tukey Female Ctrl:AMA | Tukey Male Ctrl:AMA | Tukey  Control F:M | Tukey  AMA  F:M |
| --- | --- | --- | --- | --- | --- | --- | --- |
| Insulin | F = 1.494  P = 0.227 | F = 0.009  P =0.923 | **F = 7.684**  **P = 0.008** | P = 0.702 | **P = 0.030** | P = 0.220 | P = 0.214 |
| GIP | F < 0.001  P = 0.984 | F = 1.097  P = 0.299 | F = 0.879  P = 0.352 | P = 0.920 | P = 0.899 | P = 0.999 | P = 0.493 |
| Glucagon | **F = 5.391**  **P = 0.024** | F = 0.638  P = 0.427 | F = 2.217  P = 0.142 | P = 0.946 | **P = 0.025** | P = 0.967 | P = 0.321 |
| Visfatin | F = 0.823  P = 0.368 | F = 0.196  P = 0.659 | F = 0.182  P = 0.671 | P = 0.791 | P = 0.985 | P > 0.999 | P = 0.925 |
| Ghrelin | F = 0.322  P = 0.572 | F = 0.242  P = 0.624 | F = 1.299  P = 0.260 | P = 0.633 | P = 0.976 | P = 0.968 | P = 0.650 |
| GLP1 | F = 1.434  P = 0.235 | F = 3.163  P = 0.082 | F = 1.193  P = 0.280 | P = 0.999 | P = 0.400 | P = 0.960 | P = 0.202 |
| PAI-1 | **F = 8.215**  **P = 0.006** | F = 1.753  P = 0.191 | F = 0.365  P = 0.548 | P = 0.386 | P = 0.080 | P = 0.511 | P = 0.958 |
| Resistin | F = 2.541  P = 0.116 | F = 0.253  P = 0.616 | **F = 4.861**  **P = 0.031** | P = 0.974 | P **= 0.040** | P = 0.650 | P = 0.207 |
| Leptin | **F = 5.542**  **P = 0.022** | **F = 5.487 P = 0.023** | F = 3.052  P = 0.086 | P = 0.975 | **P = 0.022** | P = 0.974 | **P = 0.028** |
| Irisin | F = 0.568  P = 0.454 | F = 2.360  P = 0.130 | F = 0.058  P = 0.809 | P = 0.985 | P = 0.884 | P = 0.818 | P = 0.551 |

Table S1. Two-way ANOVA results for placentokines and glucose metabolic biomarkers by maternal age and fetal sex.
